# Supplementary material for: Sulforaphane promotes C. elegans longevity and healthspan via DAF-16/DAF-2 insulin/IGF-1 signaling
Source: publisher site journal article supplement (doi:10.18632/aging.202512), 2021-01-20
Supplement: Supplementary file [file aging-v13i2-202512-supplementary-material-SD1.pdf]

SUPPLEMENTARY FIGURE

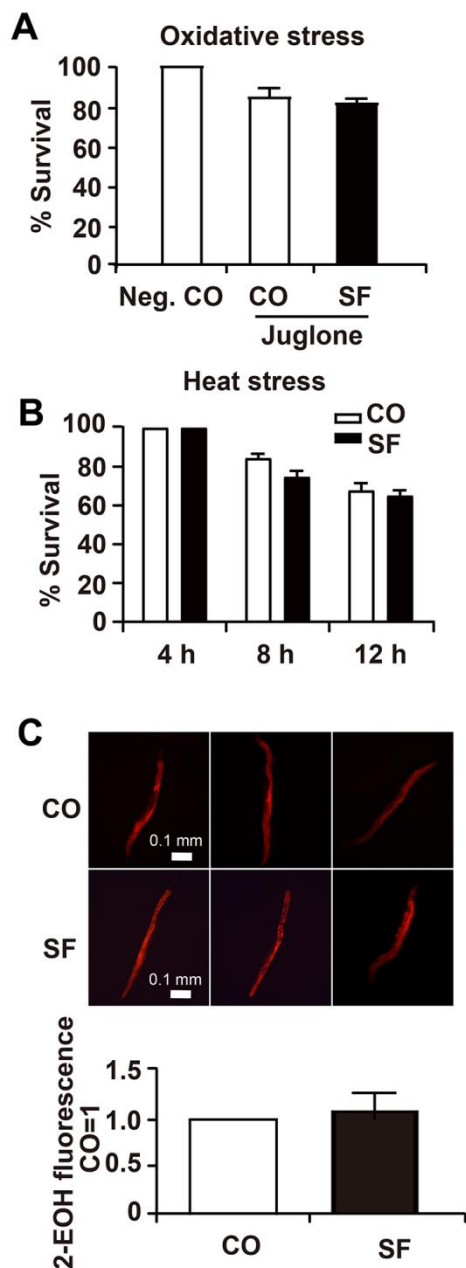

**Supplementary Figure 1. Sulforaphane does not influence stress resistance following *daf-2* mutation.** (A) *Daf-2* mutant *C. elegans* worms were prepared, treated and analyzed as described in Figure 4A. (B) Likewise, *daf-2* mutant worms were evaluated as described in Fig. 4B, or (C) as described in Figure 4C. Representative images at 100× magnification are shown, and the scale bar indicates 0.1 mm. The data are expressed as the means ±SD. \*P<0.05.
